# Supplementary material for: Application of Corn Straw, an Agro-Waste, to Remove Dyes in an Aqueous Medium, Producing Blue or Red Fibers
Source: MDPI journal article supplement (doi:10.3390/pr12040694), 2024-03-29
Supplement: s1 [file s1]

## Supplementary Materials

**Table S1.** Colorimetry results of the pigments for dye removal test.

| Sample                 | Colorimetric parameters |       |       |       |        |            | Photo                                                                                 |
|------------------------|-------------------------|-------|-------|-------|--------|------------|---------------------------------------------------------------------------------------|
|                        | L*                      | a*    | b*    | c     | h      | $\Delta E$ |                                                                                       |
| CS                     | 36.3                    | 10.09 | 13.6  | 16.93 | 53.44  | -          |    |
| CS <sub>acid</sub>     | 36.39                   | 10.53 | 12.45 | 16.31 | 49.79  | -          |    |
| CS <sub>alk</sub>      | 42.96                   | 13.92 | 11.26 | 17.91 | 38.97  | -          |    |
| CS+MB                  | 14.9                    | -9.6  | -5.89 | 11.27 | 38.97  | 35.01      |   |
| CS <sub>acid</sub> +MB | 13.06                   | -7.57 | -7.92 | 10.96 | 226.31 | 35.87      |  |
| CS <sub>alk</sub> +MB  | 13.32                   | -7.65 | -6.02 | 9.74  | 248.2  | 40.53      |  |
| CS+CR                  | 61.72                   | 22.19 | 13.07 | 25.75 | 30.49  | 28.16      |  |
| CS <sub>acid</sub> +CR | 70.31                   | 22.32 | 13.98 | 26.34 | 32.05  | 35.94      |  |
| CS <sub>alk</sub> +CR  | 52.45                   | 22.12 | 12.63 | 25.47 | 29.72  | 12.62      |  |
